# Supplementary material for: CILP-2 is a novel secreted protein and associated with insulin resistance
Source: PubMed Central journal article supplement (PMC6934158; doi:10.1093/jmcb/mjz016), 2019-06-06
Supplement: mjz016_supplementary_material.pdf [file mjz016_supplementary_material.pdf]

## **CILP-2 is a Novel Secreted Protein and Associated with Insulin Resistance**

### **Corresponding author**

Gangyi Yang and Ling Li, Department of Endocrinology, the Second Affiliated Hospital,

Chongqing Medical University, 400014 Chongqing, China.

Tel: +86-23-68485216 / Fax: +86-23-68485005.

E-mail: [gangyiyang@163.com](mailto:gangyiyang@163.com) and [liling31@hotmail.com](mailto:liling31@hotmail.com)

**Supplementary Table S1** Simple and multiple regression analyses of variables associated with circulating CILP-2 levels in the study population.

|                          | Simple   |          | Multiple |          |
|--------------------------|----------|----------|----------|----------|
|                          | <i>r</i> | <i>P</i> | <i>b</i> | <i>P</i> |
| Age (yr)                 | 0.025    | 0.662    | -----    | -----    |
| BMI (kg/m <sup>2</sup> ) | 0.041    | 0.482    | -----    | -----    |
| WHR                      | 0.341    | < 0.001  | 0.827    | < 0.001  |
| FAT (%)                  | 0.034    | 0.555    | -----    | -----    |
| SBP (mmHg)               | 0.079    | 0.171    | -----    | -----    |
| DBP (mmHg)               | 0.098    | 0.089    | -----    | -----    |
| TG (mmol/L)              | 0.265    | < 0.001  | -----    | -----    |
| TC (mmol/L)              | 0.100    | 0.083    | -----    | -----    |
| HDL-C (mmol/L)           | -0.138   | < 0.05   | -----    | -----    |
| LDL-C (mmol/L)           | 0.011    | 0.851    | -----    | -----    |
| FBG (mmol/L)             | 0.202    | < 0.001  | -----    | -----    |
| 2h-BG (mmol/L)           | 0.296    | < 0.001  | -----    | -----    |
| HbA1c (%)                | 0.150    | < 0.01   | -----    | -----    |
| FFA (μmol/L)             | 0.102    | 0.079    | -----    | -----    |
| FIns (mU/L)              | 0.246    | < 0.001  | -----    | -----    |
| 2h-Ins (mU/L)            | 0.181    | < 0.01   | -----    | -----    |
| HOMA-IR                  | 0.396    | < 0.001  | 0.033    | < 0.001  |

CILP-2 and TG were skewed and logarithmically transformed to obtain a normal distribution.

In multiple linear stepwise regression analysis, values included for analysis were age, BMI, WHR, FAT(%), SBP, DBP, TC, TG, HDL-C, LDL-C, FFA, FBG, 2h-BG, HbA1c(%), FIns, 2h-Ins and HOMA-IR. BMI, body mass index; WHR, waist-to-hip ratio; FAT (%), visceral fat percentage; SBP, systolic blood pressure; DBP, diastolic blood pressure; TG, triglyceride; TC, total cholesterol; HDL-C, high-density lipoprotein cholesterol; LDL-C, low-density lipoprotein cholesterol; FBG, fasting blood glucose; 2h-BG, 2-h blood glucose after glucose overload; FFA, free fatty acids; FIns, fasting insulin; 2h-Ins, 2-h plasma insulin after glucose overload; HOMA-IR, HOMA-insulin resistance index.

**Supplementary Table S2** Association of circulating CILP-2 with IGT and T2DM in fully adjusted models.

| Model adjust                                       | IGT   |             |          | T2DM  |             |          |
|----------------------------------------------------|-------|-------------|----------|-------|-------------|----------|
|                                                    | OR    | 95%CI       | <i>P</i> | OR    | 95%CI       | <i>P</i> |
| Age                                                | 1.015 | 1.007-1.022 | <0.001   | 1.020 | 1.013-1.028 | < 0.001  |
| Age, Sex                                           | 1.015 | 1.007-1.022 | < 0.001  | 1.020 | 1.013-1.028 | < 0.001  |
| Age, Sex, BMI                                      | 1.015 | 1.008-1.023 | < 0.001  | 1.020 | 1.013-1.028 | < 0.001  |
| Age, Sex, BMI, FAT(%)                              | 1.015 | 1.008-1.023 | < 0.001  | 1.021 | 1.013-1.028 | < 0.001  |
| Age, Sex, BMI, FAT(%), WHR                         | 1.015 | 1.007-1.022 | < 0.001  | 1.020 | 1.013-1.028 | < 0.001  |
| Age, Sex, BMI, FAT(%), WHR SBP, DBP                | 1.015 | 1.007-1.022 | < 0.001  | 1.020 | 1.012-1.028 | < 0.001  |
| Age, Sex, BMI, FAT(%), WHR SBP, DBP, Lipid profile | 1.160 | 1.008-1.241 | < 0.001  | 1.210 | 1.013-1.291 | < 0.001  |

Results of binary logistic regression analysis are presented as the odds ratio (OR) of being in IGT and T2DM status with an increase in circulating CILP-2. IGT, impaired glucose tolerance; T2DM, type 2 diabetes mellitus; IR, insulin resistance; BMI, body mass index; WHR, waist-to-hip; FAT (%), visceral fat percentage; SBP, systolic blood pressure; DBP, diastolic blood pressure; CI, confidence interval; lipid profile, including TC, FFA, TG, LDL-C and HDL-C.

**Supplementary Table S3** Clinical characteristics pre- and post-treatment with exenatide in T2DM patients.

| Item                     | Pre-treatment | Post-treatment |
|--------------------------|---------------|----------------|
| BMI (kg/m <sup>2</sup> ) | 24.6 ± 3.1    | 23.3 ± 2.7     |
| WHR                      | 0.89 ± 0.06   | 0.88 ± 0.06    |
| FAT (%)                  | 29.4 ± 5.5    | 28.6 ± 4.8     |
| SBP (mmHg)               | 131.1 ± 10.1  | 129.0 ± 10.6   |
| DBP (mmHg)               | 78.1 ± 8.0    | 79.4 ± 6.3     |
| TG (mmol/L)              | 2.00 ± 1.02   | 1.87 ± 0.99    |
| TC (mmol/L)              | 4.85 ± 1.08   | 5.05 ± 1.31    |
| HDL-C (mmol/L)           | 1.30 ± 0.27   | 1.44 ± 0.49    |
| LDL-C (mmol/L)           | 2.67 ± 0.94   | 2.87 ± 1.07    |
| FFA (umol/L)             | 0.63 ± 0.21   | 0.53 ± 0.19*   |
| FBG (mmol/L)             | 9.94 ± 2.27   | 8.08 ± 1.50**  |
| PBG (mmol/L)             | 17.2 ± 4.4    | 14.0 ± 4.9*    |
| FIns (mU/L)              | 13.8 ± 12.7   | 14.0 ± 16.2    |
| HOMA-IR                  | 6.12 ± 5.71   | 5.02 ± 6.08*   |

BMI, body mass index; WHR, waist-to-hip ratio; FAT (%), visceral fat percentage; SBP, systolic blood pressure; DBP, diastolic blood pressure; TG, triglyceride; TC, total cholesterol; HDL-C, high-density lipoprotein cholesterol; LDL-C, low-density lipoprotein cholesterol; FFA, free fatty acids; FBG, fasting blood glucose; PBG, postprandial plasma glucose; FIns, fasting insulin; HOMA-IR, HOMA-insulin resistance index. Values were given as mean ± SD (n=30). \**P* < 0.05, \*\**P* < 0.01 compared with pre-treatment.

**Supplementary Table S4** Clinical features of T2DM patients with CILP-2 expression

analysis.

| <b>Variable</b>          | <b>Controls (n=10)</b> | <b>T2DM (n=10)</b> |
|--------------------------|------------------------|--------------------|
| Age (year)               | 56.9 ± 8.2             | 58.2 ± 8.0         |
| BMI (kg/m <sup>2</sup> ) | 23.6 ± 1.6             | 24.6 ± 2.3         |
| WHR                      | 0.84 ± 0.06            | 0.89 ± 0.08*       |
| FAT (%)                  | 29.8 ± 6.8             | 33.0 ± 5.5         |
| SBP (mmHg)               | 118.4 ± 8.4            | 130.6 ± 11.4*      |
| DBP (mmHg)               | 77.4 ± 5.7             | 80.1 ± 5.67        |
| TG (mmol/L)              | 1.21 ± 0.41            | 1.92 ± 0.31**      |
| TC (mmol/L)              | 4.64 ± 0.59            | 4.85 ± 0.49        |
| HDL-C (mmol/L)           | 1.35 ± 0.44            | 1.24 ± 0.36        |
| LDL-C (mmol/L)           | 2.58 ± 0.39            | 2.63 ± 0.39        |
| FBG (mmol/L)             | 5.37 ± 0.33            | 9.16 ± 2.09**      |
| PBG (mmol/L)             | 6.74 ± 0.91            | 15.3 ± 3.6**       |
| FIns (mU/L)              | 8.16 ± 4.12            | 10.1 ± 5.5         |
| HOMA-IR                  | 1.92 ± 1.31            | 4.25 ± 1.78**      |
| HbA1c                    | 5.71 ± 0.32            | 7.89 ± 0.42**      |

BMI, body mass index; WHR, waist-to-hip ratio; FAT(%), visceral fat percentage; SBP, systolic blood pressure; DBP, diastolic blood pressure; TG, triglyceride; TC, total cholesterol; HDL-C, high-density lipoprotein cholesterol; LDL-C, low-density lipoprotein cholesterol; FBG, fasting blood glucose; PBG, postprandial plasma glucose; FIns, fasting insulin; HOMA-IR, HOMA-insulin resistance index. Values were given as mean ± SD. \**P* < 0.05, \*\**P* < 0.01 compared with controls.

**Supplementary Table S5** Characteristics of the specific primers used for RT-PCR analysis.

| Gene           | Forward and reverse primers                                                              |
|----------------|------------------------------------------------------------------------------------------|
| $\beta$ -actin | Forward : 5'-GCTGTCCCTGTATGCCTCT-3'<br>Reverse : 5'-GATGTCACGCACGATTTC-3'                |
| CILP-2 (human) | Forward : 5'-GGATGTGAGCCGCGTGA-3'<br>Reverse : 5'-CAGCCGTCCCTGTCACCCTC-3'                |
| CILP-2 (mouse) | Forward : 5'-GAATTCATGAAGAGTAAAAAGCCCCTG-3'<br>Reverse: 5'-GTCGACCTACAGCAG GACCTTGGTG-3' |
| FLAG           | GATTACAAGGACGACGATGACAAG                                                                 |

**Supplementary Table S6** Primers used for PEPCK promoter recombinant plasmids.

| Promoter regions |   | Primers                               |
|------------------|---|---------------------------------------|
| -2112/+391       | F | 5'-GGAAGATCTGAATCATTACCGTCCTTCCA-3'   |
|                  | R | 5'-CCCAAGCTTCCAGTTGTCATACTTCTTCAG-3'  |
| -1257/+391       | F | 5'-GGAAGATCTTCACCCTGTGTTCTCCAAAC-3'   |
|                  | R | 5'-CCCAAGCTTCCAGTTGTCATACTTCTTCAG-3'  |
| -1097/+391       | F | 5'-GGAAGATCTAACTCTAAGACTTGCCAGG-3'    |
|                  | R | 5'-CCCAAGCTTCCAGTTGTCATACTTCTTCAG-3'  |
| -857/+391        | F | 5'-GGAAGATCTTGTTTCATAGCCTCCACCTCAG-3' |
|                  | R | 5'-CCCAAGCTTCCAGTTGTCATACTTCTTCAG-3'  |
| -457/+391        | F | 5'-GGAAGATCTTGACCCACCTGCCTGTAAAG-3'   |
|                  | R | 5'-CCCAAGCTTCCAGTTGTCATACTTCTTCAG-3'  |
| -217/+391        | F | 5'-GGAAGATCTTGCGAGCCTCCCTGGGTG-3'     |
|                  | R | 5'-CCCAAGCTTCCAGTTGTCATACTTCTTCAG-3'  |
| -57/+391         | F | 5'-GGAAGATCTTCCAAAGAGAAGAAAGGTAAG-3'  |
|                  | R | 5'-CCCAAGCTTCCAGTTGTCATACTTCTTCAG-3'  |

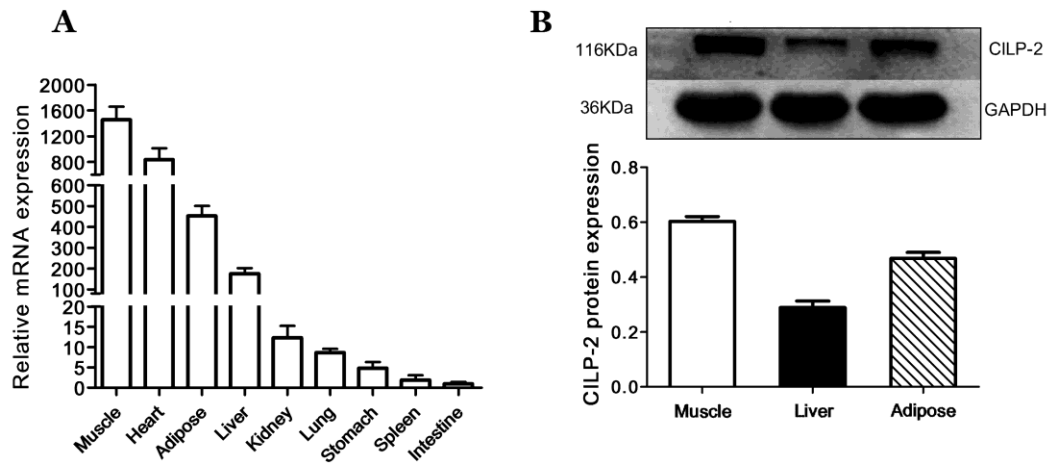

**Supplementary Figure S1** Tissue distribution of CILP-2 expression in mice. **(A)** CILP-2 mRNA expression levels in different tissues. **(B)** Protein expression in muscle, liver and adipose tissues. Values are mean  $\pm$  SEM (n=3).



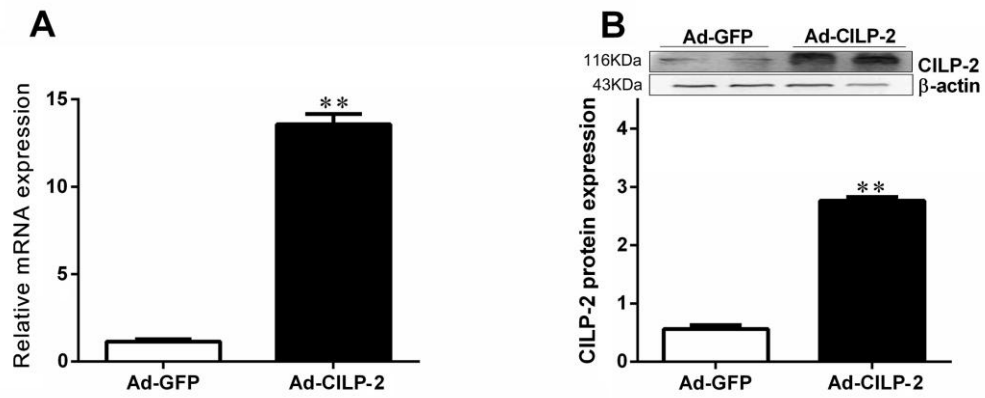

**Supplementary Figure S2** CILP-2 expression in the liver of mice. Male C57BL/6J mice were injected with Ad-CILP-2 or Ad-GFP *via* tail vein and sacrificed 10 days later. The expression of CILP-2 mRNA (**A**) and protein (**B**) in the liver. Values are mean  $\pm$  SEM (n=3).

\*\* $P < 0.01$  vs. Ad-GFP.

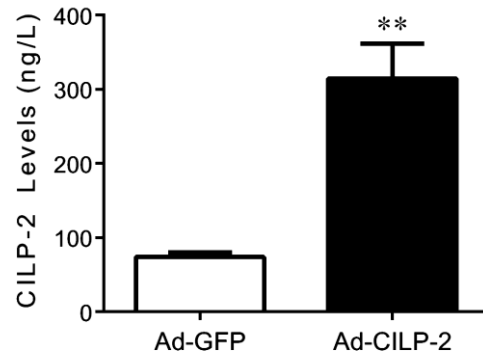

**Supplementary Figure S3** Circulating CILP-2 levels in mice. Male C57BL/6J mice were injected with Ad-CILP-2 or Ad-GFP *via* tail vein and sacrificed 10 days later. Circulating CILP-2 levels were measured by ELISA. Values are mean  $\pm$  SEM (n=3). \*\* $P < 0.01$  vs. Ad-GFP.

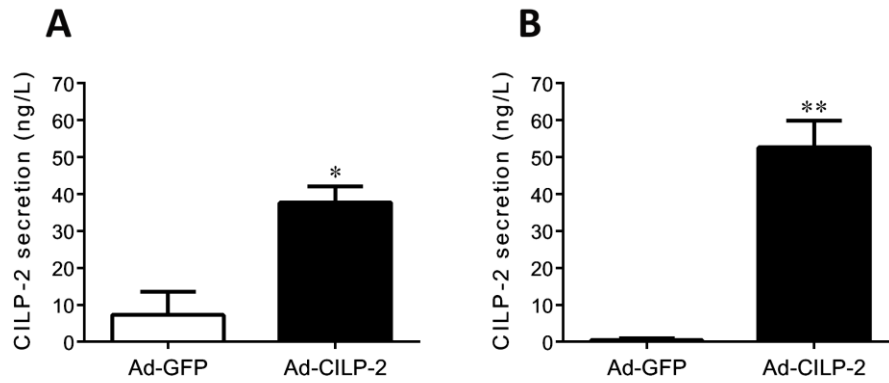

**Supplementary Figure S4** CILP-2 protein secretion in cell medium. HepG2 cells (**A**) and MPHs (**B**) were transfected with Ad-*CILP-2* or Ad-*GFP*. The CILP-2 contents in cell medium were determined by an ELISA kit. MPHs, mouse primary hepatocytes. Values are mean  $\pm$  SEM (n=3). \* $P < 0.05$ , \*\* $P < 0.01$  vs. Ad-*GFP*.

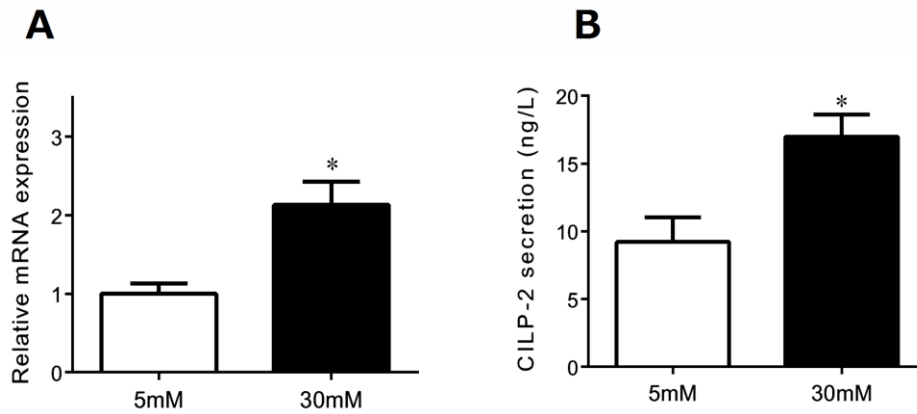

**Supplementary Figure S5** The effects of high glucose on CILP-2 mRNA expression and protein secretion in HepG2 cells. HepG2 cells were cultured as indicated in Methods and treated with 5 mM or 30 mM glucose for 24 h. **(A)** CILP-2 mRNA expression in cell lysates. **(B)** The protein concentrations of CILP-2 in the conditioned medium. Values are mean  $\pm$  SEM (n=3). \* $P < 0.05$  vs. 5 mM.
